# Supplementary material for: The organic cation transporter 2 regulates dopamine D1 receptor signaling at the Golgi apparatus
Source: eLife. 2022 Apr 25;11:e75468. doi: 10.7554/eLife.75468 (PMC9098220; doi:10.7554/eLife.75468)
Supplement: Source data 1. [file elife-75468-data1.xlsx]

## Sheet: Figure 1 source data 1
1c
	10nM-10uM DA
Time (sec)	Mean	SEM	N
0	1	0	23
20	1.00564	0.00774173	23
40	0.999627	0.0122634	23
60	0.99661	0.0136921	23
80	1.00221	0.0126273	23
100	0.956434	0.0460265	23
120	1.00152	0.014158	23
140	0.995375	0.0140079	23
160	1.00288	0.0156366	23
180	1.00476	0.0173486	23
200	1.00513	0.0179961	23
220	0.994775	0.0180497	23
240	1.01314	0.0190124	23
260	1.01295	0.0175528	23
280	1.01016	0.0165272	23
300	1.01686	0.0157064	23
320	1.00956	0.0157007	23
340	1.01628	0.0180942	23
360	1.01195	0.0203998	23
380	1.01321	0.020209	23
400	1.02579	0.0208665	23
420	1.01376	0.0223923	23
440	1.02189	0.0236001	23
460	1.01734	0.0221709	23
480	1.02179	0.0214318	23
500	0.9874	0.0288986	23
520	0.912473	0.0336816	23
540	0.891778	0.0239846	23
560	0.892093	0.0190122	23
580	0.985675	0.12527	23
600	0.968688	0.0174829	23
620	1.00105	0.019467	23
640	1.00687	0.0196959	23
660	1.00642	0.0197869	23
680	1.0141	0.0227049	23
700	1.00902	0.0213866	23
720	1.0099	0.0199599	23
740	1.00282	0.0201794	23
760	0.989728	0.0212162	23
780	0.996466	0.0212529	23
800	0.995526	0.0215001	23
820	1.00758	0.0250284	23
840	1.01099	0.0219646	23
860	1.0071	0.0232659	23
880	1.02561	0.0248902	23
900	1.01884	0.0260781	23
920	1.00472	0.0264165	23
940	1.01194	0.0262396	23
960	1.00436	0.0266597	23
980	1.01283	0.0279787	23
1000	0.999429	0.0332518	23
1020	0.926791	0.0394704	23
1040	0.918382	0.0426537	23
1060	0.907737	0.0437367	23
1080	0.902785	0.0415787	23
1100	0.76283	0.0219854	13
1120	0.813734	0.0245213	13
1140	0.830395	0.0189696	13
1160	0.8532	0.0192196	13
1180	0.873419	0.0169131	13
1200	0.887941	0.0159417	13
1220	0.886316	0.0134761	13
1240	0.836813	0.0527566	13
1260	0.876648	0.025199	23
1280	0.773693	0.0755652	21
1300	0.872315	0.0211322	23
1320	0.925649	0.0223074	23
1340	0.955351	0.02649	23
1360	0.974325	0.0282275	23
1380	0.985247	0.0282562	23
1400	0.996776	0.0304904	23
1420	0.974835	0.0285081	23
1440	0.958963	0.0265986	23
1460	0.95884	0.0263539	23
1480	0.971383	0.028828	23
1500	0.978266	0.0313349	23
1520	0.925257	0.0445563	23
1540	1.02794	0.0385612	23
1560	1.1364	0.0443369	23
1580	1.20466	0.052142	23
1600	1.244	0.061236	23
1620	1.27855	0.0672742	23
1640	1.2978	0.0775334	23
1660	1.32634	0.0820112	23
1680	1.32175	0.0849428	23
1700	1.28934	0.0840934	23
1720	1.25833	0.083568	23
1740	1.1853	0.0947733	23
1760	1.24281	0.0807285	23
1780	1.33346	0.0723726	23
1800	1.42802	0.069179	23
1820	1.502	0.075737	23
1840	1.53583	0.0773498	23
1860	1.5822	0.0790139	23
1880	1.57845	0.0821768	23
1900	1.56379	0.080171	23
1920	1.54769	0.0799413	23
1940	1.54274	0.0867284	23
1960	1.58401	0.0981767	23
1980	1.61405	0.1083	23
2000	1.61281	0.120064	23
2020	1.62914	0.126918	23
2040	1.61897	0.119837	23
2060	1.63456	0.112404	23
2080	1.67499	0.106433	23
2100	1.69784	0.101178	23
2120	1.70571	0.101717	23
2140	1.67159	0.0905433	23
	1.67125	0.0929969	10
	1.70954	0.0942917	10
	1.80301	0.107658	10
	1.88927	0.120523	10
	2.00746	0.132951	10

## Sheet: Figure 1 Source data 2
1d	HEK293		HeLa		HEK293 + OCT2-mApple
Time (sec)	Mean	SEM	Mean	SEM	Mean	SEM
0	0	7.62352	0	3.95291	0	7.2484
20	-4.31217	7.16435	0.752838	3.85742	2.07798	7.30844
40	-4.87968	7.11061	3.34715	3.9624	2.34538	7.02721
60	-4.97728	7.09842	5.93531	4.07118	3.68917	7.13115
80	-3.74907	6.83124	6.76307	4.18715	5.2294	7.36642
100	-3.95226	6.744	7.92431	4.25057	6.54865	7.34432
120	-3.97621	6.8996	9.63038	4.3011	7.95303	7.45005
140	-4.67482	6.93843	11.9586	4.38563	10.3518	7.78294
160	-2.51989	6.9364	13.8615	4.47195	11.8996	7.90786
180	-3.58268	6.94467	15.4855	4.52911	12.573	7.83117
200	-3.12994	7.18997	15.8987	4.45747	14.293	7.85134
220	-4.17169	7.06948	16.7434	4.4479	15.8016	7.99886
240	-2.21561	7.10973	17.1443	4.45058	16.1059	7.95772
260	-3.4224	6.90062	16.5384	4.36007	18.3287	8.03158
280	-3.70209	6.7475	16.4789	4.3109	21.0017	8.23407
300	-3.68137	6.36745	17.3006	4.26601	21.309	8.06121
320	-3.02596	6.45925	18.0249	4.27086	23.6438	8.24231
340	-3.88235	6.3624	18.9928	4.35605	25.2038	8.28131
360	-3.18035	6.21994	19.1012	4.31197	25.6338	8.01398
380	-2.88302	6.51386	19.4033	4.31471	27.1665	7.80178
400	-4.04986	6.64602	20.5458	4.30796	26.8334	7.74994
420	-2.78009	6.84916	20.7351	4.30192	28.5592	7.69296
440	-4.64688	6.96036	20.5962	4.24468	31.1092	7.77569
460	-2.52429	6.74185	20.9819	4.1834	33.1783	7.81544
480	-2.86444	6.90641	20.9773	4.13713	33.3162	8.03168
500	-3.61644	6.6909	21.1201	4.11389	30.9747	8.13272
520	-4.51204	6.66759	21.317	4.06941	33.2018	8.07395
540	-2.84096	6.64324	22.2702	4.07919	36.6807	7.9222
560	-1.88449	6.95079	22.0078	4.04892	40.3324	8.03619
580	1.34244	7.46697	22.8028	4.04737	41.6165	8.07019
600	0.777361	7.29143	23.6004	4.05282	42.2863	8.12911
620	0.790856	7.52691	25.637	4.12442	43.3202	8.17703
640	1.03289	7.62168	27.6649	4.19553	44.8357	8.09829
660	1.16075	7.72139	28.8119	4.23527	48.1228	8.22843
680	2.59229	8.05898	29.126	4.21267	50.0754	8.31253
700	3.09119	8.10409	29.7445	4.18156	52.7723	8.33987
720	3.48688	8.22592	29.8614	4.16785	54.4713	8.37761
740	3.75324	8.22501	30.723	4.21224	55.8322	8.41271
760	3.68453	7.9946	31.3712	4.22515	57.389	8.33699
780	5.82998	8.43359	30.8793	4.15933	58.389	8.36685
800	6.53428	8.62525	31.3588	4.24508	61.01	8.47561
820	7.69801	8.63373	29.8158	4.84087	61.3024	8.3808
840	7.10518	8.67958	30.1437	4.90176	62.9324	8.51772
860	7.57412	8.52703	30.5775	4.86874	65.3794	8.65831
880	7.97135	8.34937	31.2011	4.77645	66.9418	8.69062
900	7.73543	8.72312	31.9153	4.87577	68.8165	8.77434
920	7.02012	8.71372	32.3782	4.83891	70.472	8.80576
940	6.57765	9.00108	34.4708	4.96312	70.977	8.8791
960	6.4517	8.90555	33.7908	4.91533	72.6935	8.97441
980	9.22299	9.31119	34.6678	4.94012	75.2037	9.0983
1000	11.9342	9.75208	34.7859	4.78863	76.7237	9.17852
1020	11.5808	9.59338	35.7827	4.87601	76.0684	9.18238
1040	11.4903	9.81982	36.6851	4.94343	73.792	9.90328
1060	10.3875	10.9661	36.1711	4.80911	79.6439	9.37536
1080			36.2719	4.82442
1100			36.5879	4.85909

## Sheet: Figure 2 source data 1
2B	10uM DA		10uM corticosterone pretreatment; 10uM DA		100uM Imipramine pretreatment; 10uM DA		10uM imipramine pretreatment; 10uMDA
Time (sec)	Mean	SEM	Mean	SEM	Mean	SEM	Mean	SEM
0	0	3.95291	1.38466e-14	9.363	-1.52127e-14	10.3585	1.63533e-14	7.23511
20	0.752838	3.85742	9.68641	9.13105	1.48493	10.409	-2.06689	6.71563
40	3.34715	3.9624	17.2081	9.20249	1.17803	10.2889	-9.51749	5.48805
60	5.93531	4.07118	22.8835	9.25719	0.611639	10.1747	-13.5644	5.03626
80	6.76307	4.18715	28.5512	9.70258	-0.710656	9.92367	-14.5154	4.93245
100	7.92431	4.25057	33.1233	10.0675	-7.93621	9.31856	-15.7288	4.87272
120	9.63038	4.3011	37.7033	10.4486	-9.93895	9.12169	-15.8228	5.09792
140	11.9586	4.38563	41.1951	10.7372	-10.0309	9.10733	-12.3212	5.72182
160	13.8615	4.47195	44.5494	11.0131	-9.64249	9.14535	-8.69256	6.37132
180	15.4855	4.52911	46.366	11.1831	-9.46794	9.11066	-8.23698	6.46108
200	15.8987	4.45747	44.8673	11.0995	-8.7973	9.21003	-8.0308	6.37811
220	16.7434	4.4479	44.9288	11.2268	-7.87582	9.31414	-7.45822	6.34838
240	17.1443	4.45058	42.5237	10.9121	-8.94245	9.22006	-6.19894	6.30301
260	16.5384	4.36007	43.1557	11.031	-8.20287	9.28604	-3.2811	6.46032
280	16.4789	4.3109	43.7877	10.9802	-7.51527	9.33669	-1.90867	6.60452
300	17.3006	4.26601	44.6899	10.7814	-6.71277	9.44917	-1.18643	6.77224
320	18.0249	4.27086	45.2419	10.7432	-7.38158	9.43097	-1.74716	6.8129
340	18.9928	4.35605	45.9378	10.8604	-7.39461	9.42855	-2.43325	6.66115
360	19.1012	4.31197	47.727	10.9839	-6.62489	9.57154	-3.09456	6.59018
380	19.4033	4.31471	49.5385	11.0948	-6.18358	9.64868	-5.17483	6.32388
400	20.5458	4.30796	49.4839	11.0654	-6.18233	9.58693	-5.01263	6.34129
420	20.7351	4.30192	50.4306	11.0609	-6.67207	9.49154	-6.41884	6.32251
440	20.5962	4.24468	49.7539	10.9503	-7.25488	9.41542	-6.2991	6.41485
460	20.9819	4.1834	49.5641	10.8797	-6.6022	9.51331	-5.62189	6.51271
480	20.9773	4.13713	50.0201	10.8169	-6.79727	9.54693	-5.59907	6.3603
500	21.1201	4.11389	51.2429	10.8456	-6.14473	9.63679	-5.6975	6.2235
520	21.317	4.06941	51.8848	10.784	-5.59008	9.67305	-5.91354	6.32735
540	22.2702	4.07919	52.7024	10.8014	-5.52682	9.71363	-5.77016	6.40839
560	22.0078	4.04892	51.9459	10.6634	-4.63226	9.74782	-6.05073	6.40785
580	22.8028	4.04737	53.4176	10.7067	-4.56327	9.70423	-6.25146	6.45329
600	23.6004	4.05282	54.3884	10.7257	-3.69408	9.80433	-7.4359	6.33008
620	25.637	4.12442	55.5698	10.7871	-4.40522	9.66779	-7.92664	6.36213
640	27.6649	4.19553	56.1959	10.8583	-3.16053	9.90062	-9.65332	6.22262
660	28.8119	4.23527	58.764	10.9694	-3.27121	9.86259	-8.35964	6.31241
680	29.126	4.21267	58.7562	11.0038	-3.15144	9.91741	-7.41007	6.41961
700	29.7445	4.18156	59.4028	11.052	-2.79792	9.87271	-7.18476	6.54162
720	29.8614	4.16785	61.7298	11.1867	-2.45222	9.92004	-8.52997	6.50617
740	30.723	4.21224	62.0314	11.2146	-3.20476	9.80441	-7.31759	6.696
760	31.3712	4.22515	61.7967	11.1646	-2.39645	9.91421	-8.38094	6.58548
780	30.8793	4.15933	64.1697	11.358	-2.93908	9.83628	-8.15048	6.65968
800	31.3588	4.24508	64.5465	11.3689	-1.36675	10.0804	-8.68194	6.50299
820	29.8158	4.84087	64.1959	11.3822	-2.92575	9.82003	-8.78065	6.53752
840	30.1437	4.90176	66.4548	11.5667	-2.72593	9.92425	-10.414	6.39768
860	30.5775	4.86874	67.8308	11.6384	-2.02192	9.90967	-5.95673	7.16963
880	31.2011	4.77645	67.2219	11.6165	-1.62898	9.97484	-6.2829	7.08453
900	31.9153	4.87577	69.9317	11.7947	-1.23523	10.0862	-6.04378	7.12843
920	32.3782	4.83891	70.304	11.8662	-1.4089	10.0005	-8.01188	7.43851
940	34.4708	4.96312	68.6429	11.7618	-0.844193	10.2217	-6.5094	7.68371
960	33.7908	4.91533	70.1134	11.9959	-1.81494	9.94777	-5.66321	8.25959
980	34.6678	4.94012	71.088	12.0764	0.175816	10.2839	-6.449	7.82538
1000	34.7859	4.78863	71.8677	12.1178	-1.44367	10.0623	-4.9819	8.21078
1020	35.7827	4.87601	73.4287	12.2516	-2.63324	9.87761	-5.81981	8.10768
1040	36.6851	4.94343	74.2475	12.3466	-2.04372	9.82503	-6.28019	7.72262
1060	36.1711	4.80911	75.8394	12.4575	-2.488	9.86933	-6.36137	7.56899
1080	36.2719	4.82442	72.8527	12.5525	0.246484	10.2651
1100	36.5879	4.85909	72.3809	12.6222
1120			72.8037	12.8403

## Sheet: Figure 2 Source data 2
2C	100uM Imipramine pretreatment; 10uM DA _10uM SKF
Time (sec)	Mean	SEM
0	-1.52127e-14	10.3585
20	1.48493	10.409
40	1.17803	10.2889
60	0.611639	10.1747
80	-0.710656	9.92367
100	-7.93621	9.31856
120	-9.93895	9.12169
140	-10.0309	9.10733
160	-9.64249	9.14535
180	-9.46794	9.11066
200	-8.7973	9.21003
220	-7.87582	9.31414
240	-8.94245	9.22006
260	-8.20287	9.28604
280	-7.51527	9.33669
300	-6.71277	9.44917
320	-7.38158	9.43097
340	-7.39461	9.42855
360	-6.62489	9.57154
380	-6.18358	9.64868
400	-6.18233	9.58693
420	-6.67207	9.49154
440	-7.25488	9.41542
460	-6.6022	9.51331
480	-6.79727	9.54693
500	-6.14473	9.63679
520	-5.59008	9.67305
540	-5.52682	9.71363
560	-4.63226	9.74782
580	-4.56327	9.70423
600	-3.69408	9.80433
620	-4.40522	9.66779
640	-3.16053	9.90062
660	-3.27121	9.86259
680	-3.15144	9.91741
700	-2.79792	9.87271
720	-2.45222	9.92004
740	-3.20476	9.80441
760	-2.39645	9.91421
780	-2.93908	9.83628
800	-1.36675	10.0804
820	-2.92575	9.82003
840	-2.72593	9.92425
860	-2.02192	9.90967
880	-1.62898	9.97484
900	-1.23523	10.0862
920	-1.4089	10.0005
940	-0.844193	10.2217
960	-1.81494	9.94777
980	0.175816	10.2839
1000	-1.44367	10.0623
1020	-2.63324	9.87761
1040	-2.04372	9.82503
1060	-2.488	9.86933
1080	0.246484	10.2651
1100	8.55484	12.2967
1120	34.8319	12.5009
1140	58.1879	12.5904
1160	60.4932	12.6232
1180	62.6148	12.7506
1200	63.4341	12.7277
1220	63.125	12.7471
1240	63.8584	12.794
1260	63.6533	12.7189
1280	66.5846	12.9251
1300	65.7231	12.8492
1320	66.0014	12.9014
1340	66.49	12.8774
1360	66.591	12.8702
1380	67.5145	12.904
1400	68.4609	12.9241
1420	67.4372	12.88
1440	67.623	12.8199
1460	69.0425	12.826
1480	67.6521	12.7375
1500	66.8171	12.6817
1520	68.0173	12.7959
1540	70.0551	12.9488
1560	69.8002	12.9432
1580	70.0177	12.9077
1600	72.0963	13.0339
1620	73.7253	13.137
1640	74.1397	13.1636
1660	74.8049	13.1558
1680	75.3341	13.1384
1700	76.601	13.2501
1720	77.2525	13.3392
1740	77.5584	13.3346
1760	80.2782	13.5073
1780	81.8193	13.5786
1800	82.7246	13.6037
1820	84.2718	13.7638
1840	86.1585	13.9321
1860	87.1262	13.9902
1880	88.1572	14.0296
1900	88.0134	13.9884
1920	88.2292	14.0535
1940	88.9872	14.1082
1960	89.7888	14.1071
1980	92.7518	14.3294
2000	92.5923	14.2359
2020	94.2954	14.3877
2040	95.0564	14.4093
2060	96.5497	14.5178
2080	96.3581	14.4662
2100	99.6225	14.7377
2120	101.818	14.8916
2140	102.031	14.848
2160	103.093	14.9594
2180	104.469	15.0684
2200	104.377	15.0933
	104.207	15.1402
	104.997	15.2033
	107.044	15.3342

## Sheet: Figure 2 Source data 3
2f	scramble shRNA		OCT2 shRNA-B
Time (sec)	Mean	SEM	Mean	SEM
0	0	0	0	0
20	5.85093	2.61369	-30.5423	5.38918
40	14.9326	5.82662	-35.3253	5.84789
60	20.202	8.41872	-33.8128	6.60634
80	25.8928	9.90053	-31.3543	7.73438
100	29.4548	9.24901	-29.0139	8.41529
120	30.276	9.54618	-27.2292	8.98098
140	26.7286	8.93408	-24.493	9.43249
160	28.3432	9.31139	-23.0122	9.95441
180	32.6688	10.3491	-21.1915	10.3035
200	29.6835	10.6546	-20.3293	10.8916
220	34.1512	12.5593	-19.6883	10.8626
240	31.6353	9.73555	-19.4941	11.2968
260	35.6064	9.31466	-18.3415	10.7429
280	35.7355	8.23955	-18.0821	10.9034
300	36.7205	9.12827	-18.667	11.4102
320	36.5234	7.76585	-18.5234	11.7699
340	34.3921	6.61696	-19.5842	12.2699
360	29.0098	5.99416	-19.4725	11.6165
380	33.0624	7.02083	-19.7956	12.7421
400	32.3351	7.12255	-19.7961	11.1524
420	27.7571	9.51203	-19.0666	11.6181
440	31.8653	8.35145	-16.1439	12.6011
460	35.8597	8.08962	-19.1742	11.8212
480	40.6552	7.56673	-19.2198	11.9617
500	29.7543	11.1603	-18.2554	12.0856
520	32.583	8.62106	-17.8951	13.3527
540	40.1082	9.74165	-12.8168	13.4776
560	36.5748	9.91319	-15.22	13.6322
580	37.4597	10.0551	-16.4469	13.1507
600	38.0916	8.19322	-17.6048	12.6389
620	40.2509	8.85901	-17.6027	11.839
640	37.2153	10.9795	-17.8715	12.8229
660	44.4623	11.1989	-16.7927	12.8304
680	39.6769	13.0242	-17.5201	11.9037
700	47.5757	11.633	-15.1822	12.8191
720	46.306	10.1923	-10.7434	15.4322
740	49.0425	12.8434	-14.2495	13.9408
760	54.3528	15.034	-20.0139	12.9502
780	47.5489	11.368	-27.7646	10.1233
800	59.8035	18.9077	-27.0507	9.97282
820	56.1712	15.065	-16.7909	12.4634
840	57.5305	14.0871	-29.9636	8.4784
860	48.9386	12.129	-29.6379	9.38718
880	51.0685	12.8666	-26.4667	9.50041
900	56.7583	11.8858	-37.4032	5.68399
920	50.1504	14.0794	-36.5192	5.3737
940	61.7983	32.2307	-35.12	5.60688
960	65.1435	35.5863	-34.1264	6.87377
980	61.7871	33.5871	-21.5348	14.091
1000	66.315	41.1913	-28.704	8.17243
1020	62.7664	32.9654	-25.2115	10.5682
1040	67.0907	39.5942	-26.8223	11.419
1060	69.117	37.7046	-35.2744	5.65961
1080	64.7406	39.0645	-25.6076	13.1275
1100	72.7901	50.3349	-35.0008	6.54614
1120	67.1917	37.5684	-34.9787	6.22509
1140	67.7161	41.6581	-36.7941	5.95188

## Sheet: Figure 2 Source data 4
2g	OCT2 shRNA-B (10uM DA+ 10uM SKF)
Time (sec)	Mean	SEM
0	0	0
20	-30.5423	5.38918
40	-35.3253	5.84789
60	-33.8128	6.60634
80	-31.3543	7.73438
100	-29.0139	8.41529
120	-27.2292	8.98098
140	-24.493	9.43249
160	-23.0122	9.95441
180	-21.1915	10.3035
200	-20.3293	10.8916
220	-19.6883	10.8626
240	-19.4941	11.2968
260	-18.3415	10.7429
280	-18.0821	10.9034
300	-18.667	11.4102
320	-18.5234	11.7699
340	-19.5842	12.2699
360	-19.4725	11.6165
380	-19.7956	12.7421
400	-19.7961	11.1524
420	-19.0666	11.6181
440	-16.1439	12.6011
460	-19.1742	11.8212
480	-19.2198	11.9617
500	-18.2554	12.0856
520	-17.8951	13.3527
540	-12.8168	13.4776
560	-15.22	13.6322
580	-16.4469	13.1507
600	-17.6048	12.6389
620	-17.6027	11.839
640	-17.8715	12.8229
660	-16.7927	12.8304
680	-17.5201	11.9037
700	-15.1822	12.8191
720	-10.7434	15.4322
740	-14.2495	13.9408
760	-20.0139	12.9502
780	-27.7646	10.1233
800	-27.0507	9.97282
820	-16.7909	12.4634
840	-29.9636	8.4784
860	-29.6379	9.38718
880	-26.4667	9.50041
900	-37.4032	5.68399
920	-36.5192	5.3737
940	-35.12	5.60688
960	-34.1264	6.87377
980	-21.5348	14.091
1000	-28.704	8.17243
1020	-25.2115	10.5682
1040	-26.8223	11.419
1060	-35.2744	5.65961
1080	-25.6076	13.1275
1100	-35.0008	6.54614
1120	-34.9787	6.22509
1140	-36.7941	5.95188
1160	11.5691	16.8654
1180	12.3827	17.271
1200	11.7425	17.006
1220	4.42476	23.5535
1240	10.3638	25.1888
1260	14.7527	26.2642
1280	18.8018	27.3356
1300	20.7988	27.6024
1320	24.3779	27.7218
1340	26.7208	28.6974
1360	29.0854	28.5582
1380	30.0558	27.9839
1400	31.392	27.9789
1420	35.1742	29.0794
1440	36.8127	28.9844
1460	64.2768	20.3168
1480	41.5209	29.8182
1500	69.0589	19.3357
1520	47.0556	31.2726
1540	46.8079	30.2683
1560	73.5054	19.8366
1580	74.3438	19.6648
1600	74.2741	19.795
1620	75.4376	19.6948
1640	76.2272	18.4871
1660	78.2727	18.4443
1680	80.7421	19.3298
1700	83.2275	19.8787
1720	81.8281	19.2196
1740	84.558	20.5028
1760	85.9197	20.7143

## Sheet: Figure 3 Surce data 1
3c	MSN 10uM DA		MSN 100uM Imipramine +10uM DA
Time (sec)	Mean	SEM	Mean	SEM
0	0	10.9217	0	8.03955
20	3.44308	11.0603	-4.69718	7.55983
40	12.1683	11.4643	-5.26688	7.69626
60	21.9651	12.111	-2.63935	7.38269
80	25.4059	13.1389	1.07126	7.88494
100	29.225	13.7429	6.17169	7.63674
120	33.6302	14.3031	6.55329	7.35706
140	36.5903	14.6134	6.57663	7.44807
160	37.8604	14.7998	6.50496	6.93212
180	40.1689	14.7355	7.36926	6.75164
200	43.5375	15.1862	8.59706	6.76888
220	46.2585	15.4431	9.28396	7.10594
240	48.5297	15.4983	9.13607	7.04418
260	49.2763	15.6422	10.6272	7.30252
280	50.7376	15.2332	8.95327	7.64777
300	50.5421	14.9283	9.65376	7.95546
320	50.1023	14.4422	10.8597	7.65966
340	52.5396	14.3583	10.0569	7.14324
360	54.1162	14.1843	13.3993	7.23626
380	56.2821	14.2876	15.0359	7.80921
400	55.9771	14.0204	10.0452	7.63603
420	56.3137	14.0678	10.9397	7.11415
440	56.8503	14.0809	10.8474	7.45666
460	56.3489	13.9037	12.1161	7.9849
480	56.072	14.0203	11.3453	7.17003
500	56.3237	13.812	9.32568	7.58217
520	55.8144	14.1123	9.08339	7.82895
540	55.0051	13.8787	7.64183	7.82488
560	55.9864	13.9109	7.95141	7.84473
580	57.2346	13.7747	6.50602	8.45332
600	56.4345	13.8554	7.87736	6.98083
620	56.1227	13.6509	7.80367	7.67361
640	55.3183	13.5344	9.21149	7.4905
660	54.4162	13.5457	7.35936	6.83921
680	56.181	13.6909	9.83269	7.78459
700	55.6424	13.467	8.09169	7.94322
720	55.7961	13.4244	8.59743	8.20646
740	55.6373	13.4037	10.2516	7.85721
760	56.6072	13.3831	6.97355	8.34577
780	54.7823	13.2083	7.31156	9.14502
800	57.1925	13.2847	3.80905	8.83944
820	59.8506	13.4807	8.45163	9.79408
840	59.1795	13.4596	9.85112	8.0471
860	60.1226	13.4942	6.9789	8.87248
880	62.3824	13.7702	4.70476	9.29437
900	63.9843	13.9285	5.93911	10.2647
920	67.2593	14.5009	4.93443	9.59637
940	67.4485	14.8443	5.01101	9.78065
960	65.12	14.3161	6.40989	9.57868
980	64.2631	14.3412	4.04745	11.1739
1000	64.9237	14.5675	2.14808	10.4415
1020	63.9664	14.4854	4.93803	11.5147
1040	65.7575	14.5947	3.66102	11.0019
1060	67.5099	14.7676	3.91839	10.6192
1080	65.699	15.406	6.03148	10.3935

## Sheet: Figure 4 source data 1
4d
Log [SKF]	SKF (% of Max FSK)																		SKF + RAP (% of Max FSK)
-6	106	118	114	115	113	123	92	114	129	109	118	122	92	114	107	123	121	113	115	106	82	114	93	71	108	88	75	119	115	74	80	80	97	115	117	112
-7	105	110	114	99	120	121	100	137	138	105	103	114	107	102	111	138	129	111	106	116	77	92	90	59	123	87	77	116	111	68	87	90	94	107	115	116
-8	94	101	109	75	78	87	100	119	121	82	96	89	105	107	97	94	89	80	108	112	76	65	69	43	112	98	79	92	94	60	86	92	90	81	77	78
-8.5	79	84	89	41	44	41	76	88	95	62	75	64	73	72	69	91	85	74	97	96	65	32	33	22	103	86	64	72	74	42	60	62	63	72	76	87
-9	47	54	57	18	19	20	56	77	69	45	50	47	58	63	52	58	46	41	61	77	47	19	19	13	73	69	47	51	49	33	57	66	55	49	53	55
-9.5	26	28	32	11	13	13	34	40	45	31	27	27	37	40	34	37	30	27	32	47	28	15	11	9	45	41	28	34	35	21	37	39	34	32	30	34
-10	15	16	16	12	12	13	18	22	22	31	32	30	26	29	27	25	20	21	19	17	15	13	9	8	23	24	16	34	32	22	20	23	21	22	18	25
-12	12	10	10	9	11	10	10	13	12	28	30	26	12	15	16	21	17	19	11	11	9	11	9	8	13	13	11	29	30	21	9	10	11	22	21	22
-13	7	8	8	10	11	11	7	8	7	26	25	24	16	21	19	20	17	17	8	9	7	10	11	8	8	7	6	30	28	22	12	13	13	19	19	19

## Sheet: Figure 4 source data 2
4e
Log [SKF]	SKF (% of Max FSK)															SKF + RAP (% of Max FSK)
-6	95	110	106	86	108	111	105	111	103	113	122	102	109	111	117	95	100	61	91	94	65	105	97	85	84	80	88	86	94	93
-7	82	115	87	89	112	108	93	116	116	105	101	102	110	109	105	110	95	68	92	87	52	101	83	76	82	77	93	90	98	96
-8	78	91	85	65	82	82	75	102	89	108	92	86	73	85	94	97	68	46	65	60	36	85	94	76	83	77	82	76	70	88
-8.5	42	69	49	26	33	32	59	76	73	98	90	71	78	89	69	56	62	34	32	29	18	71	70	53	75	68	74	45	58	53
-9	22	33	28	11	13	15	48	53	51	71	62	49	38	41	34	33	35	17	18	17	10	50	48	39	54	53	54	31	38	37
-9.5	14	21	19	11	14	14	30	34	43	41	38	28	23	24	23	25	22	12	13	13	8	36	36	30	34	33	35	19	25	22
-10	16	15	16	11	14	14	15	15	15	29	26	24	18	18	19	15	16	9	14	13	7	19	17	15	21	22	24	14	17	17
-12	13	15	13	10	11	12	10	10	9	15	17	18	14	16	16	13	15	10	13	11	8	12	12	12	11	14	15	12	14	14
-13	33	58	62	7	8	11	8	9	9	16	17	17	12	14	13	59	67	41	11	12	8	8	9	8	12	15	15	10	12	12

## Sheet: Figure 4 source data 3
4f	FSK																																	FSK + RAP
10 μM	93	103	94	76	95	100	81	112	114	58	72	74	89	98	94	110	103	91	73	84	78	80	96	87	87	113	110	98	92	102	82	105	83	101	99	43	82	73	50	134	118	91	63	84	76	59	71	81	102
1 μM	66	61	66	52	50	51	33	44	43	37	39	42	62	56	57	81	68	58	28	55	51	42	57	51	34	48	45	58	53	51	77	65	61	59	44	14	50	53	35	47	44	45	51	67	56	54	66	67	65
[truncated: 17 more columns]

[truncated: 9 more sheets: Figure 5 source data 1, Figure 6 source data 1, Fig 1-Fig Supp 1-Source data 1, Fig 1-Fig Supp 1 Source data 2, Fig 1-Fig Supp 1 Source data 3, Fig 1-Fig Supp 3 Source data 1, Fig 1-Fig Supp  3 Source data 2, Fig 1-Fig Supp 4 Source data 1, Fig 2-Fig Supp 1 Source data 1]
